# Supplementary material for: Multi-triggered and enzyme-mimicking graphene oxide/polyvinyl alcohol/G-quartet supramolecular hydrogels
Source: Royal Society of Chemistry journal article supplement (doi:10.1039/c9nr10779g), 2020-01-01
Supplement: c9nr10779g1.pdf [file c9nr10779g1.pdf]

## Supporting Information

### Multi-triggered and Enzyme-Mimicking Graphene Oxide/Polyvinyl Alcohol/G-Quartet Supramolecular Hydrogels

Jiaying Zhang,<sup>a</sup> Na Lu,<sup>a,\*</sup> Hongzhen Peng,<sup>b,c,d</sup> Jie Li,<sup>a</sup> Ruohong Yan,<sup>a</sup> Xuerong Shi,<sup>a</sup>  
Pan Ma,<sup>a</sup> Min Lv,<sup>b,c</sup> Lihua Wang,<sup>b,c</sup> Zisheng Tang,<sup>e,f,g,\*</sup> and Min Zhang<sup>h,\*</sup>

<sup>a</sup>School of Materials Engineering, Shanghai University of Engineering Science,  
Shanghai 201620, China

<sup>b</sup>Department of Endodontics, Shanghai Ninth People's Hospital, College of  
Stomatology, Shanghai Jiao Tong University School of Medicine, Shanghai 200011,  
China

<sup>c</sup>Division of Physical Biology, CAS Key Laboratory of Interfacial Physics and  
Technology, Shanghai Institute of Applied Physics, Chinese Academy of Sciences,  
Shanghai, 201800, China

<sup>d</sup>University of Chinese Academy of Sciences, Beijing 100049, China

<sup>e</sup>Shanghai Synchrotron Radiation Facility, Zhangjiang Laboratory, Shanghai  
Advanced Research Institute, Chinese Academy of Sciences, Shanghai, 201210,  
China

<sup>f</sup>National Clinical Research Center of Oral Diseases, Shanghai 200011, China

<sup>g</sup>Shanghai Key Laboratory of Stomatology & Shanghai Research Institute of

Stomatology, Shanghai 200011, China

<sup>h</sup>College of Chemistry and Chemical Engineering, Shanghai University of  
Engineering Science, Shanghai 201620, China

**Table S1.** Inversion tests about the formation of GO/G4 or GO/G4/H hydrogels.

| Compotents                               | GO                                                                                | Guanosine<br>(G)                                                                  | H <sub>3</sub> BO <sub>3</sub>                                                    | K <sup>+</sup> | Hemin<br>(H)                                                                       | Inver-<br>sion tube                                                                   | Gel<br>forma-<br>tion |
|------------------------------------------|-----------------------------------------------------------------------------------|-----------------------------------------------------------------------------------|-----------------------------------------------------------------------------------|----------------|------------------------------------------------------------------------------------|---------------------------------------------------------------------------------------|-----------------------|
|                                          | 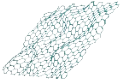 | 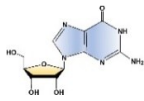 | 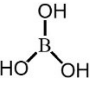 |                | 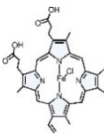 |                                                                                       |                       |
| 1 GO/G                                   | +                                                                                 | +                                                                                 | —                                                                                 | —              | —                                                                                  | 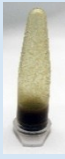   | ×                     |
| 2 GO/H                                   | +                                                                                 | —                                                                                 | —                                                                                 | —              | +                                                                                  | 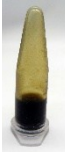   | ×                     |
| 3 GO/G/H                                 | +                                                                                 | +                                                                                 | —                                                                                 | —              | +                                                                                  | 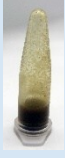  | ×                     |
| 4 GO/G/H <sub>3</sub> BO <sub>3</sub>    | +                                                                                 | +                                                                                 | +                                                                                 | —              | —                                                                                  | 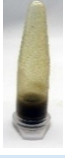 | ×                     |
| 5 GO/G/H <sub>3</sub> BO <sub>3</sub> /H | +                                                                                 | +                                                                                 | +                                                                                 | —              | +                                                                                  | 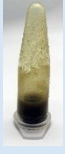 | ×                     |
| 6 GO/G/K <sup>+</sup>                    | +                                                                                 | +                                                                                 | —                                                                                 | +              | —                                                                                  | 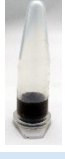 | ×                     |
| 7 GO/G/K <sup>+</sup> /H                 | +                                                                                 | +                                                                                 | —                                                                                 | +              | +                                                                                  | 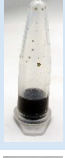 | ×                     |
| 8 GO/G4                                  | +                                                                                 | +                                                                                 | +                                                                                 | +              | —                                                                                  | 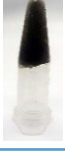 | √                     |

|   |         |   |   |   |   |   |                                                                                     |   |
|---|---------|---|---|---|---|---|-------------------------------------------------------------------------------------|---|
| 9 | GO/G4/H | + | + | + | + | + | 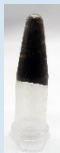 | ✓ |
|---|---------|---|---|---|---|---|-------------------------------------------------------------------------------------|---|

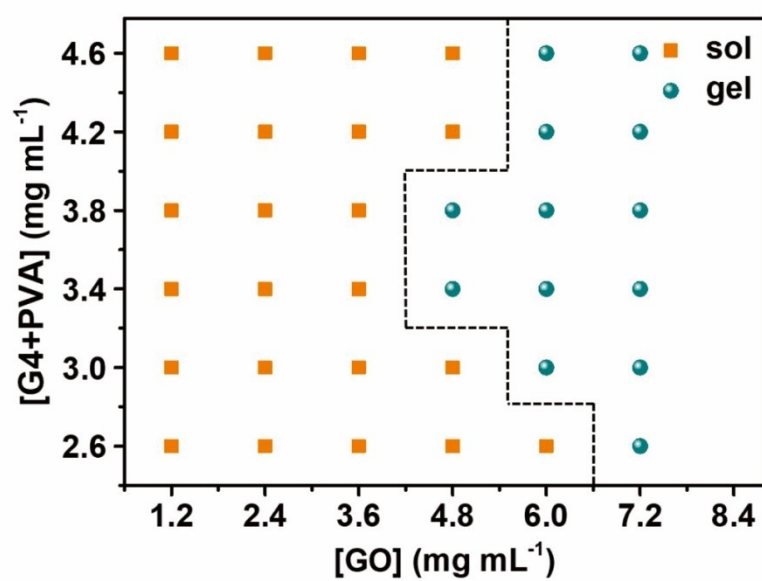

**Fig. S1** Concentration-dependent gel evolution experiments were performed to make clear the influence of the components on the gelation process.

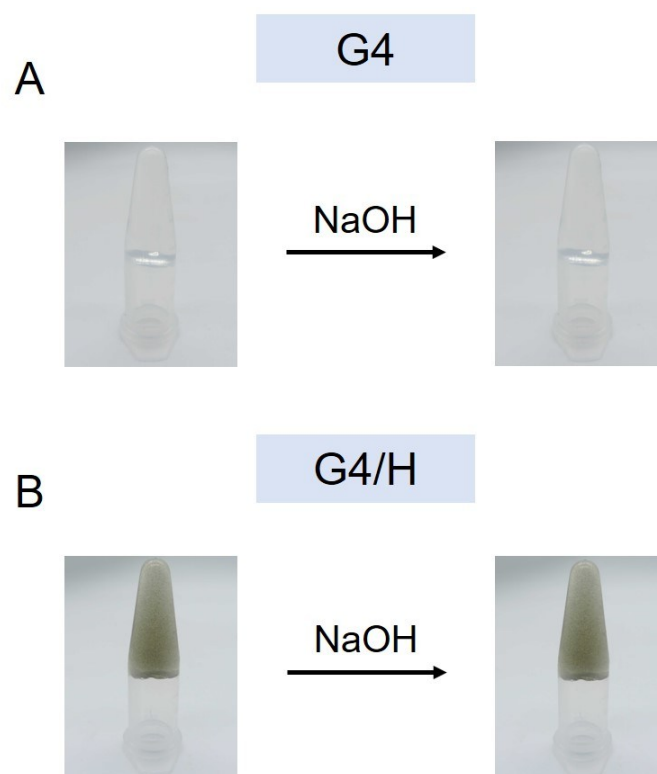

**Fig. S2.** Photographs of the phase change of G4 (A) and G4/H (B) hydrogels after addition of NaOH.

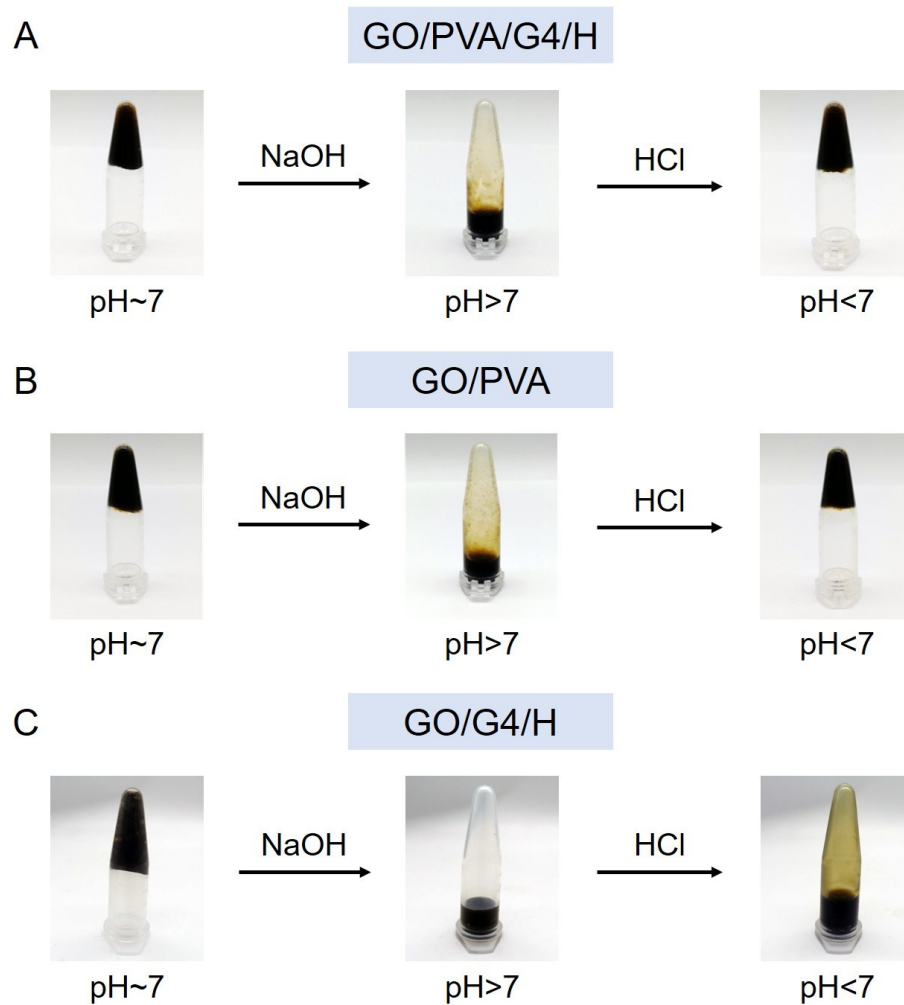

**Fig S3.** Photographs of pH-induced phase transitions of GO/PVA/G4/H (A), GO/PVA (B), and GO/G4/H (C) hydrogels.

**Table S2.** Influence of the concentration of  $\text{Fe}^{3+}$ , glucose, and urea on the logic gate.

|   | Concentration                      | Time (sec) | Inversion test                                                                        |
|---|------------------------------------|------------|---------------------------------------------------------------------------------------|
| 1 | $[\text{Fe}^{3+}] = 10 \text{ mM}$ | 8          | 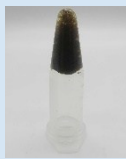   |
| 2 | $[\text{Fe}^{3+}] = 5 \text{ mM}$  | 40         | 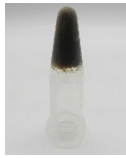   |
| 3 | $[\text{Fe}^{3+}] = 1 \text{ mM}$  | 160        | 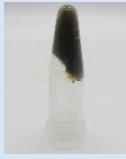   |
| 4 | $[\text{glucose}] = 55 \text{ mM}$ | 15         | 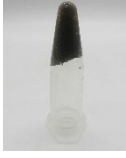  |
| 5 | $[\text{glucose}] = 25 \text{ mM}$ | 60         | 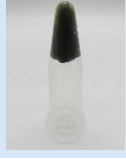 |
| 6 | $[\text{glucose}] = 5 \text{ mM}$  | 360        | 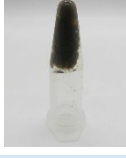 |
| 7 | $[\text{Urea}] = 60 \text{ mM}$    | 18         | 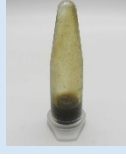 |
| 8 | $[\text{Urea}] = 30 \text{ mM}$    | 80         | 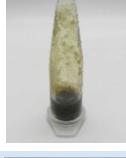 |
| 9 | $[\text{Urea}] = 6 \text{ mM}$     | 300        | 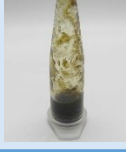 |
